# Supplementary material
Source: PubMed Central journal article supplement (PMC3456988)

| <b>Table 1- Co-Morbidity Categories and Corresponding ICD-9-CM Codes.</b> |                                                                                                         |
|---------------------------------------------------------------------------|---------------------------------------------------------------------------------------------------------|
| <b>Disease category</b>                                                   | <b>Applied ICD-9-CM codes</b>                                                                           |
| HIV                                                                       | 042, V08                                                                                                |
| HCV                                                                       | 070.51, 070.54, 070.7, 070.70-070.71, 070.41, V02.62                                                    |
| HBV                                                                       | 070.20-070.33, V02.61                                                                                   |
| Other Infectious and parasitic diseases                                   | 001-139 excluding 042, V08, 070.51, 070.54, 070.7, 070.70-070.71, 070.41, V02.62, 070.20-070.33, V02.61 |
| Neoplasm                                                                  | 140-239                                                                                                 |
| Endocrine, nutritional and metabolic diseases                             | 240-279                                                                                                 |
| Sickle cell disease                                                       | 282.60-282.69, 282.41-282.42                                                                            |
| Other hematologic diseases                                                | 280-289 excluding 282.60-282.69, 282.41-282.42                                                          |
| Mental disorders                                                          | 290-319                                                                                                 |
| Nervous system disease                                                    | 320-389                                                                                                 |
| Cardiovascular diseases                                                   | 390-459                                                                                                 |
| Respiratory diseases                                                      | 460-519                                                                                                 |
| Digestive diseases                                                        | 520-579                                                                                                 |
| Genitourinary diseases                                                    | 580-629                                                                                                 |
| Skin diseases                                                             | 680-709                                                                                                 |
| Musculoskeletal and connective tissue diseases                            | 710-739                                                                                                 |
| Injury and poisoning                                                      | 800-999                                                                                                 |

**Figure 1-** Frequency of HIV diagnosis based on other co-morbidities in two study periods. Denominator for each frequency is total number of hospital discharges with disease status.

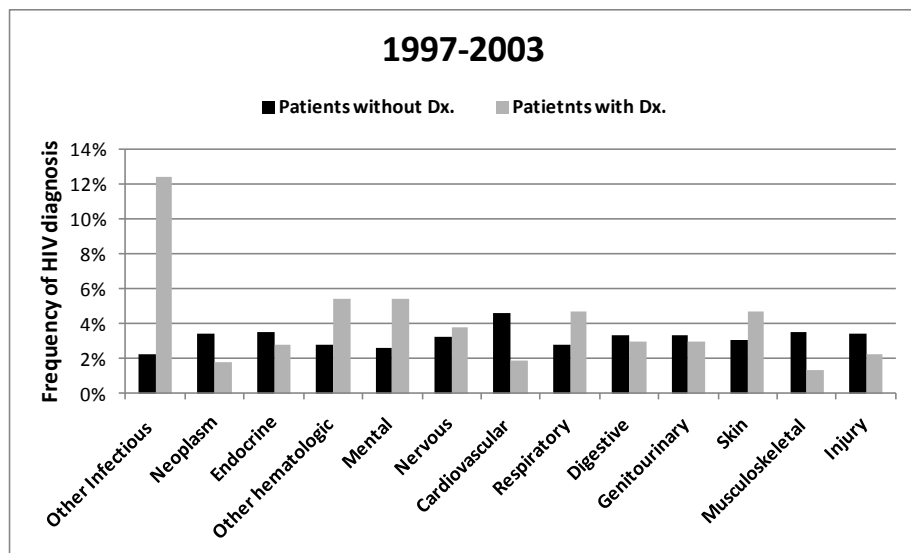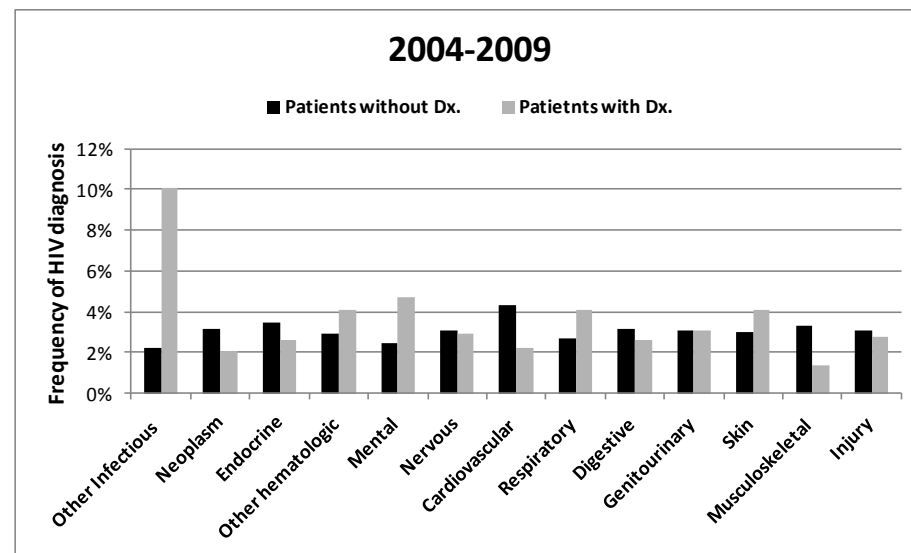

**Figure 2-** a) Age specific frequency of HCV diagnosis by concurrent SCD diagnosis in two study periods. b) Age specific frequency of HBV diagnosis by concurrent SCD diagnosis in two study periods. In both graphs, denominator for each frequency is total number of hospital discharges for the same age group and sickle cell status.

a)

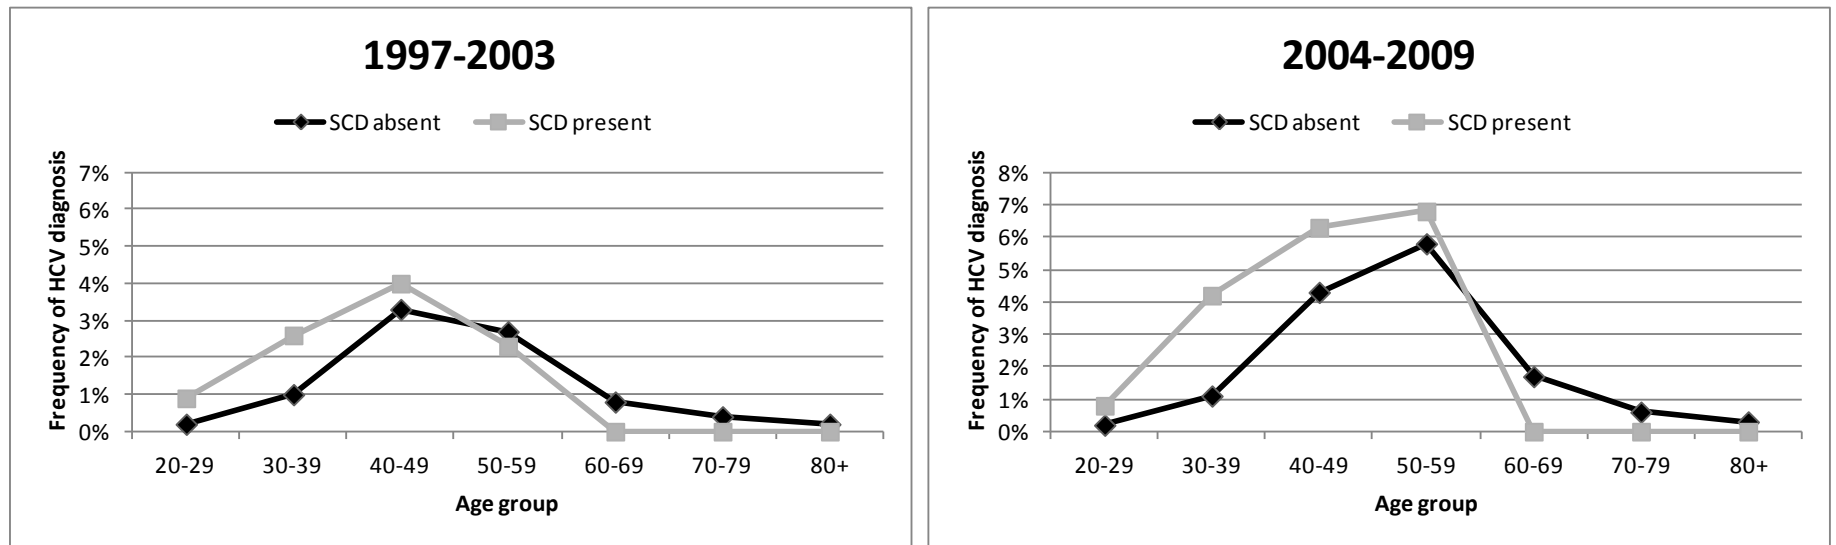

b)

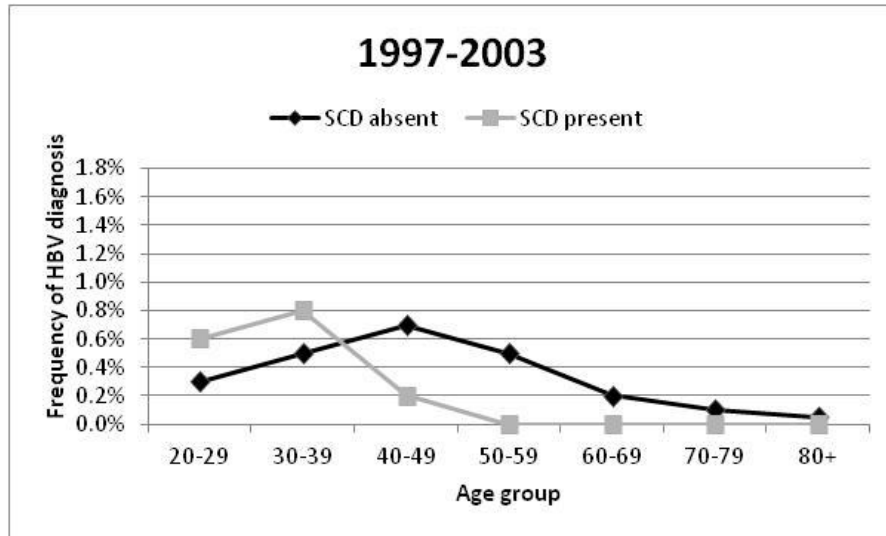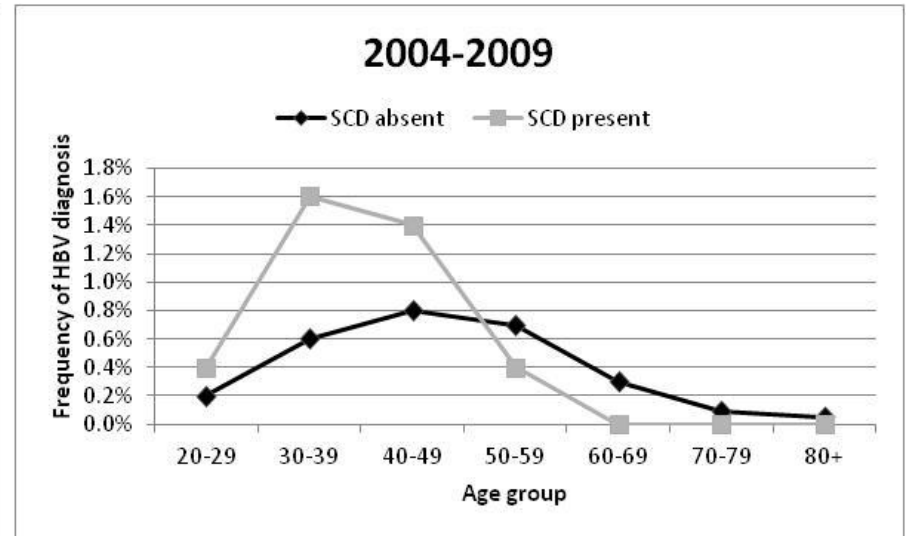

Supplement: NIHMS381186-supplement-Supplementary_material.pdf [file NIHMS381186-supplement-Supplementary_material.pdf]
